# Supplementary material for: Status Reinforcement in Emerging Economies: The Psychological Experience of Local Candidates Striving for Global Employment
Source: Atypon-hosted journal article supplement (doi:10.1287/orsc.2016.1099), 2016-12-01

**\*\*\*ONLINE APPENDIX\*\*\***  
**Online Appendix A**  
**Multi-Item Measures Created for Studies 1 and 2**

Study 1

**Wasta** I would need the recommendation of wasta in this job situation.  
I would need a connection to get this job.  
I would only get offered a job through wasta.  
Wasta is only way to secure job offer in such a situation.

Study 2

**Communal** Hamad/Hamda clearly cares about relationships.  
Hamad/Hamda puts people first.  
Hamad/Hamda enjoys working with other people.  
Having good relationships with colleagues is important to Hamad/Hamda.  
Hamad/Hamda talks too much. (Arabic expression; reverse coded)

**Modest** Hamad/Hamda is modest.  
Hamad/Hamda displays the appropriate level of modesty.  
Hamad/Hamda acted in an immodest manner. (reverse coded)  
Hamad/Hamda is respectful toward his/her seniors.  
Hamad/Hamda doesn't know when to stop. (Arabic expression; reverse coded)

**Materialistic** Hamad/Hamda is materialistic.  
Hamad/Hamda is threatening to leave the company in order to get more money.  
Hamad/Hamda's negotiating behavior is aggressive.

Hamad/Hamda is pressuring the company to pay him/her more.

Hamad/Hamda is giving up a lot on his/her demands. (reverse coded)

**Online Appendix B Illustration of Moderated Mediation Effects Predicted in Hypothesis 6 for Male Locals (adapted from Hayes, 2013)**

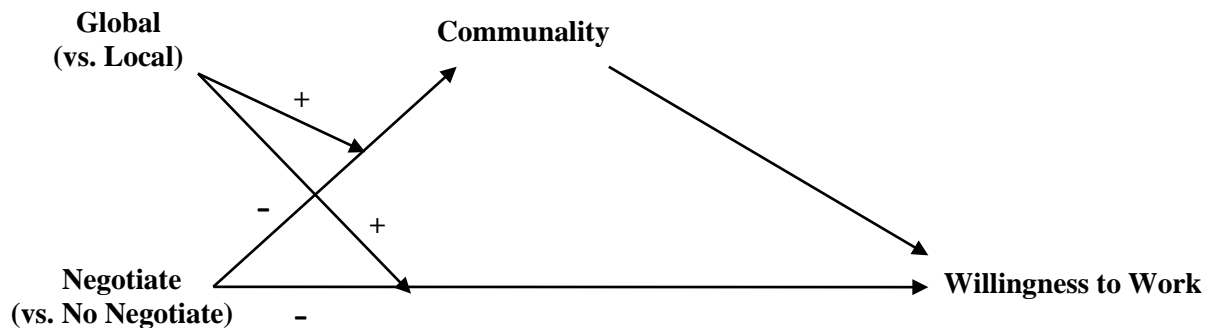

**Online Appendix C. Study 2: Estimated Marginal Mean Willingness to Work with Local Employee, Generated by ANCOVA (in Table 3) Testing Effects of Global/Local Employment Context, Employee Gender, and Negotiate (Yes/No) Conditions and Controlling for Participants' Arabic/English Language Proficiency**

| Context                              |              |      | Employee           |                    |
|--------------------------------------|--------------|------|--------------------|--------------------|
|                                      |              |      | Male               | Female             |
| Local                                | No Negotiate | mean | 5.85               | 6.29 <sup>a</sup>  |
|                                      |              | SE   | (.16)              | (.16)              |
|                                      |              | n    | 53                 | 55                 |
|                                      | Negotiate    | mean | 5.65               | 5.34               |
|                                      |              | SE   | (.16)              | (.14)              |
|                                      |              | n    | 56                 | 66                 |
| Within Local: Mean difference        |              |      | 0.20               | 0.95 <sup>**</sup> |
| Global                               | No Negotiate | mean | 5.78               | 5.52               |
|                                      |              | SE   | (.18)              | (.17)              |
|                                      |              | n    | 43                 | 45                 |
|                                      | Negotiate    | mean | 4.92               | 5.04               |
|                                      |              | SE   | (.18)              | (.20)              |
|                                      |              | n    | 40                 | 35                 |
| Within Global: Mean difference       |              |      | 0.86 <sup>**</sup> | 0.48 <sup>†</sup>  |
| Within No Negotiate: Mean difference |              |      | 0.07               | 0.77 <sup>**</sup> |
| Within Negotiate: Mean difference    |              |      | 0.73 <sup>**</sup> | 0.30               |

<sup>†</sup> $p = .06$ . <sup>\*\*</sup> $p < .01$ .

<sup>a</sup> Indicates a significant gender difference within condition at level of  $p < .05$ .

**Online Appendix D Model of Multiple Mediation for Local Female Employees in Study 2,**

**Showing that Evaluators Were Less Inclined to Work with a Female Employee when She Negotiated for Higher Compensation (as Compared to When She Let the Opportunity to Negotiate Pass) Because Negotiating Made Her Appear Insufficiently Communal and Modest and Overly Materialistic (Graphic adapted from Preacher and Hayes, 2008, p. 881). All regressions included controls for participants' language proficiency.**

\*  $p < .05$ . \*\*  $p < .01$ . \*\*\*  $p < .001$ .

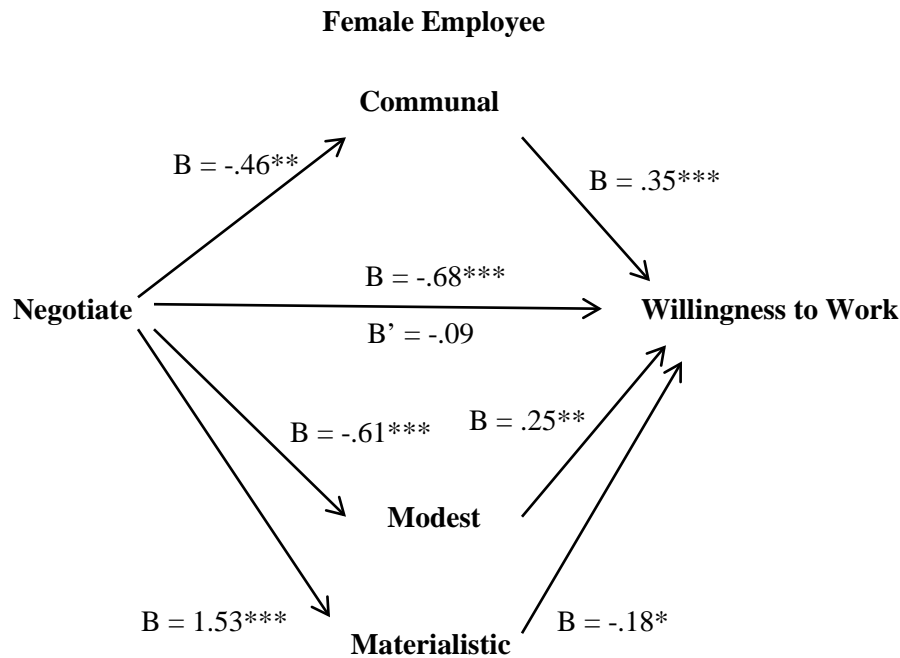

Supplement: orsc.2016.1099-sm.pdf [file orsc.2016.1099-sm.pdf]
